# Supplementary material for: The adaptive landscape of a metallo-enzyme is shaped by environment-dependent epistasis
Source: PubMed Central journal article supplement (PMC8222346; doi:10.1038/s41467-021-23943-x), 2021-06-23
Supplement: 41467_2021_23943_MOESM1_ESM.pdf [file 41467_2021_23943_MOESM1_ESM.pdf]

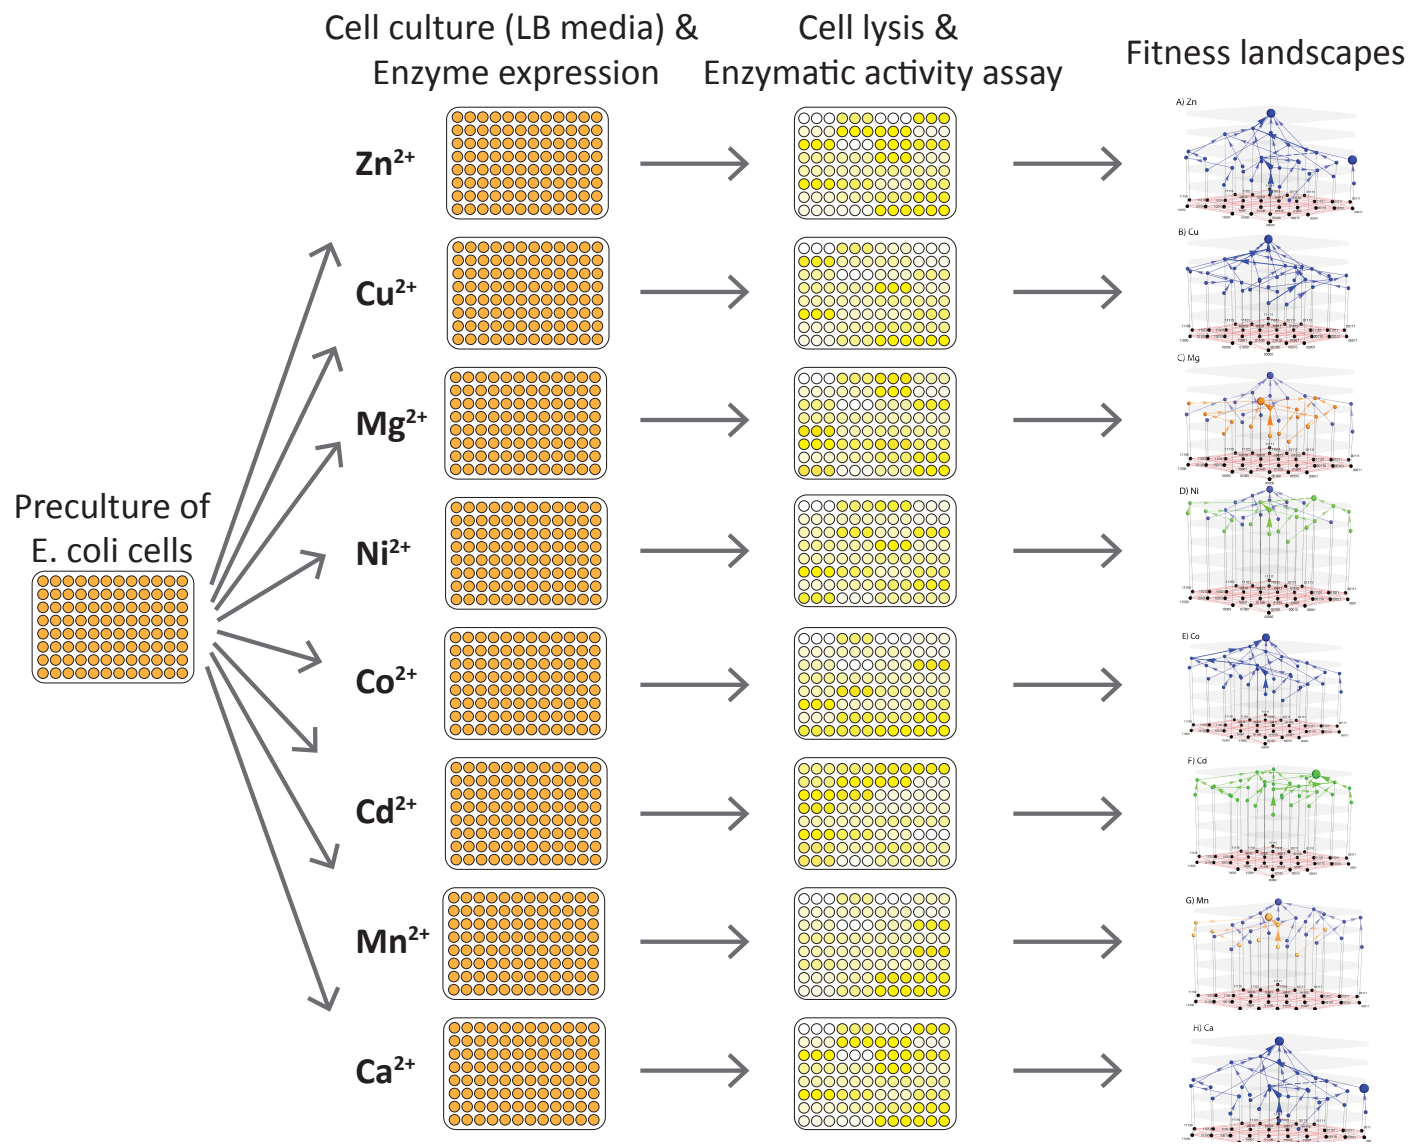

1  
2 **Supplementary Figure 1 Outline of the experimental and analytical scheme.** Enzymes were  
3 expressed in *E. coli* in the presence of 100  $\mu\text{M}$  of metal supplied in the media, and lysed with 200  
4  $\mu\text{M}$  of the metal in the buffer. Lysate activities are measured using 20  $\mu\text{L}$  of cell lysate and 80  $\mu\text{L}$   
5 of assay buffer containing 500  $\mu\text{M}$  methyl-parathion (final concentration 400  $\mu\text{M}$ ) and 200  $\mu\text{M}$  of  
6 metal.  
7  
8

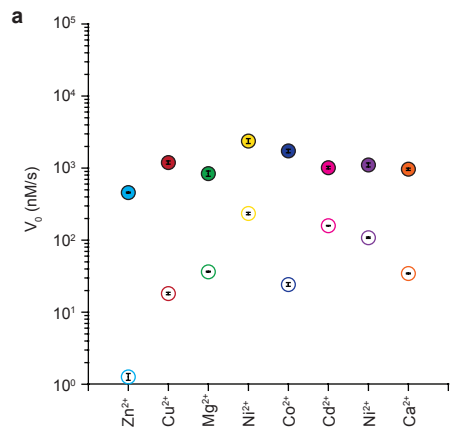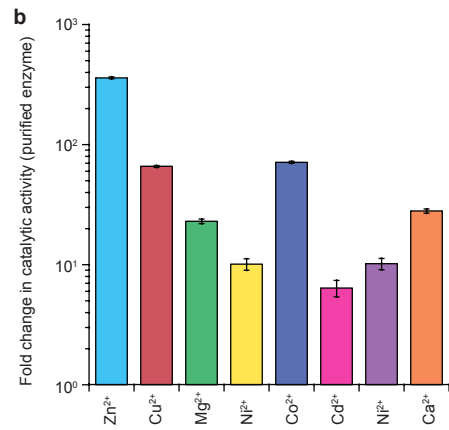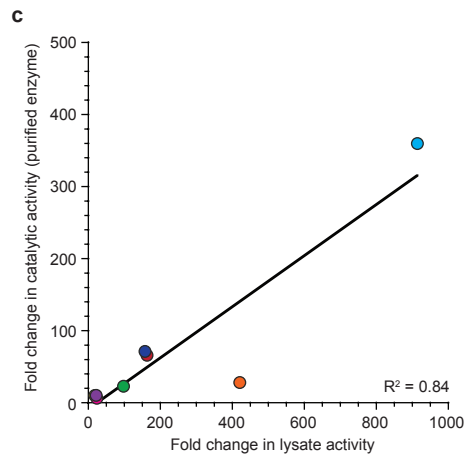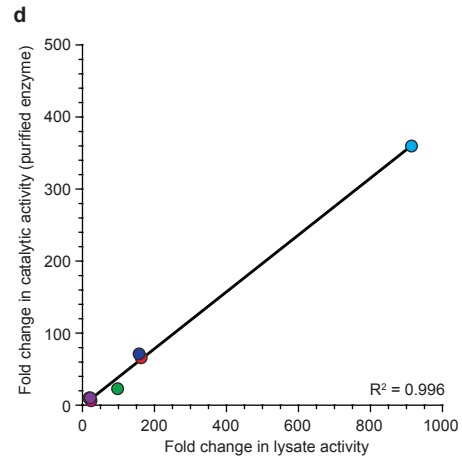

1  
2 **Supplementary Figure 2 a**, Catalytic activities of purified enzymes. Enzymes were grown in 30  
3 mL of 2x YT media supplied with 100  $\mu\text{M}$  of metal, and purified in buffer supplied with 200  $\mu\text{M}$   
4 of the metal. The activities were assayed using 10  $\mu\text{L}$  of enzyme and 90  $\mu\text{L}$  of assay buffer  
5 containing 500  $\mu\text{M}$  of methyl-parathion (final concentration 450  $\mu\text{M}$ ) and 200  $\mu\text{M}$  of the metal.  
6 The activities were normalized to an enzyme concentration of 1  $\mu\text{M}$ . **b**, The collective effect of  
7 all five historical substitutions (fold-change in catalytic activity between ancestral genotype and  
8 derived genotype) in each metal environment. **c** and **d**, Relation (linear correlation) between  
9 fold-change in lysate activity and fold-change in catalytic activity of purified enzymes when **c**,  
10 all metals are included and **d**, all metals except for  $\text{Ca}^{2+}$  is included.  
11  
12

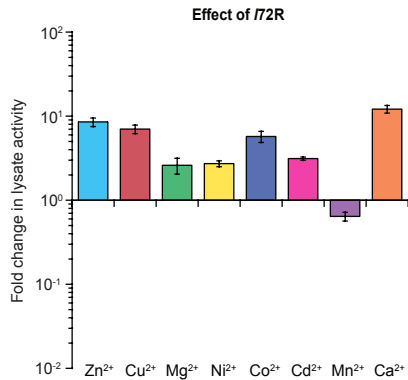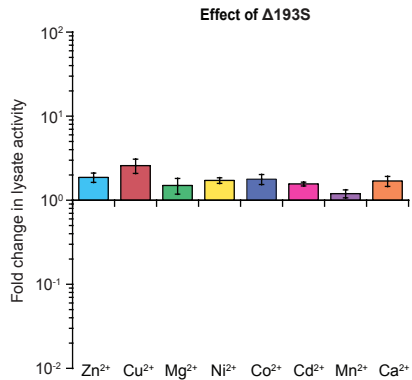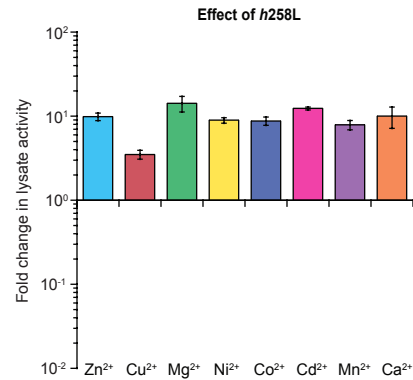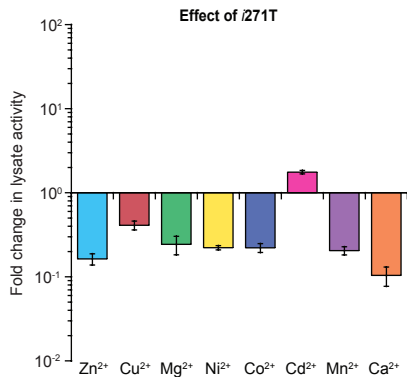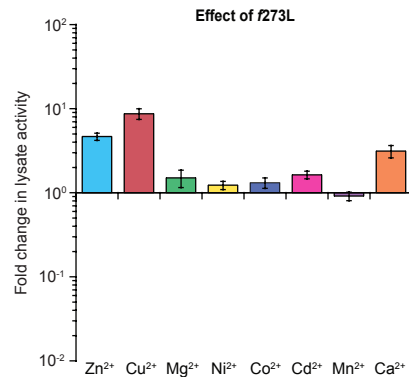

1  
2  
3  
4  
5  
6  
7

**Supplementary Figure 3 The effect of each individual substitution when introduced into the ancestral genetic background.**

Shows the effect of introducing each mutation into the original ancestral background. Bars show average effect and bars show SEM, as calculated from replicate measurements.

1 **Supplemental Tables**

2  
3

| <b>Terms</b>                  | <b>Zn</b> | <b>Cu</b> | <b>Mg</b> | <b>Ni</b> | <b>Co</b> | <b>Cd</b> | <b>Mn</b> | <b>Ca</b> |
|-------------------------------|-----------|-----------|-----------|-----------|-----------|-----------|-----------|-----------|
| pos72                         | 0.295     | 0.188     | 0.083     | 0.070     | 0.297     | 0.035     | -0.063    | 0.264     |
| pos193                        | 0.301     | 0.311     | 0.211     | 0.190     | 0.242     | 0.120     | 0.188     | 0.269     |
| pos258                        | 0.321     | 0.051     | 0.397     | 0.333     | 0.318     | 0.333     | 0.429     | 0.394     |
| pos271                        | -0.236    | -0.111    | -0.151    | -0.172    | -0.248    | -0.036    | -0.103    | -0.140    |
| pos273                        | 0.338     | 0.291     | 0.175     | 0.097     | 0.185     | 0.031     | 0.133     | 0.300     |
| pos72pos193                   | 0.179     | 0.161     | 0.132     | 0.064     | 0.113     | 0.018     | 0.094     | 0.090     |
| pos72pos258                   | -0.129    | -0.068    | -0.135    | -0.098    | -0.069    | -0.065    | -0.121    | -0.218    |
| pos72pos271                   | 0.045     | 0.074     | 0.104     | 0.112     | 0.066     | 0.056     | 0.086     | 0.011     |
| pos72pos273                   | 0.151     | 0.014     | 0.069     | 0.011     | 0.108     | -0.037    | 0.050     | 0.046     |
| pos193pos258                  | -0.012    | -0.012    | 0.003     | 0.008     | -0.001    | 0.025     | -0.003    | 0.008     |
| pos193pos271                  | 0.021     | 0.037     | 0.015     | 0.027     | 0.014     | 0.017     | 0.014     | 0.027     |
| pos193pos273                  | 0.154     | 0.086     | 0.098     | 0.038     | 0.110     | 0.044     | 0.074     | 0.098     |
| pos258pos271                  | 0.144     | 0.092     | 0.111     | 0.020     | 0.049     | -0.107    | 0.093     | 0.160     |
| pos258pos273                  | -0.020    | -0.006    | -0.001    | 0.000     | 0.014     | 0.056     | 0.020     | -0.021    |
| pos271pos273                  | 0.155     | 0.109     | 0.142     | 0.120     | 0.162     | -0.004    | 0.116     | 0.178     |
| pos72pos193pos258             | -0.005    | 0.037     | 0.007     | 0.010     | 0.001     | 0.027     | -0.013    | 0.038     |
| pos72pos193pos271             | 0.030     | 0.045     | 0.029     | 0.018     | 0.028     | 0.026     | 0.002     | 0.030     |
| pos72pos193pos273             | 0.167     | 0.064     | 0.084     | 0.044     | 0.103     | 0.016     | 0.062     | 0.094     |
| pos72pos258pos271             | 0.006     | -0.002    | 0.058     | 0.033     | 0.042     | 0.022     | 0.008     | -0.044    |
| pos72pos258pos273             | 0.083     | 0.104     | 0.014     | 0.019     | 0.041     | 0.041     | -0.007    | 0.059     |
| pos72pos271pos273             | 0.142     | 0.124     | 0.060     | 0.073     | 0.098     | 0.045     | 0.031     | 0.054     |
| pos193pos258pos271            | -0.004    | -0.007    | -0.006    | -0.009    | -0.005    | -0.015    | -0.020    | -0.032    |
| pos193pos258pos273            | 0.017     | 0.014     | -0.003    | -0.011    | -0.019    | 0.026     | -0.001    | -0.019    |
| pos193pos271pos273            | -0.025    | -0.028    | -0.010    | -0.033    | -0.013    | 0.011     | -0.001    | -0.015    |
| pos258pos271pos273            | 0.072     | 0.041     | 0.052     | -0.010    | 0.058     | 0.016     | 0.041     | 0.049     |
| pos72pos193pos258pos271       | -0.010    | -0.001    | -0.017    | -0.024    | -0.019    | -0.024    | -0.017    | 0.049     |
| pos72pos193pos258pos273       | -0.008    | -0.007    | -0.012    | -0.005    | -0.012    | 0.014     | 0.007     | -0.005    |
| pos72pos193pos271pos273       | -0.001    | -0.025    | -0.004    | -0.017    | 0.012     | 0.003     | 0.000     | -0.005    |
| pos72pos258pos271pos273       | 0.005     | -0.028    | -0.016    | -0.014    | 0.006     | -0.012    | 0.002     | -0.004    |
| pos193pos258pos271pos273      | 0.002     | -0.019    | 0.004     | -0.019    | -0.032    | 0.005     | -0.008    | 0.002     |
| pos72pos193pos258pos271pos273 | -0.022    | -0.014    | 0.006     | -0.020    | -0.026    | -0.012    | -0.014    | 0.012     |

4  
5  
6  
7  
8

**Supplemental Table 1:** All mutational effects as determined by linear models (see **Methods**) across all metal environments tested. Epistatic interactions were determined up to full fifth-order interactions.

| Terms              | Zn     | Cu     | Mg     | Ni    | Co    | Cd     | Mn     | Ca     |
|--------------------|--------|--------|--------|-------|-------|--------|--------|--------|
| pos72              | 0.13   | 0.10   | 0.018  | 0.020 | 0.20  | 0.035  | 0.012  | 0.12   |
| pos193             | 0.14   | 0.29   | 0.12   | 0.15  | 0.13  | 0.120  | 0.11   | 0.13   |
| pos258             | 0.16   | 0.008  | 0.42   | 0.45  | 0.22  | 0.333  | 0.57   | 0.28   |
| pos271             | 0.084  | 0.037  | 0.060  | 0.12  | 0.14  | -0.036 | 0.033  | 0.035  |
| pos273             | 0.17   | 0.25   | 0.082  | 0.038 | 0.076 | 0.031  | 0.055  | 0.16   |
| First Order Model  | 0.68   | 0.68   | 0.70   | 0.77  | 0.76  | 0.018  | 0.78   | 0.72   |
| Second Order Model | 0.21   | 0.19   | 0.25   | 0.18  | 0.17  | -0.065 | 0.19   | 0.22   |
| Third Order Model  | 0.094  | 0.11   | 0.048  | 0.042 | 0.06  | 0.056  | 0.022  | 0.04   |
| Fourth Order Model | 0.0003 | 0.005  | 0.002  | 0.006 | 0.004 | -0.037 | 0.001  | 0.004  |
| Fifth Order Model  | 0.0007 | 0.0006 | 0.0001 | 0.002 | 0.001 | 0.025  | 0.0006 | 0.0003 |

1  
2 **Supplemental Table 2:** R<sup>2</sup> values for all linear models tested. These reflect the proportion of  
3 overall variation (including experimental error) that is explained by a linear relationship with the  
4 specified mutation or the respective model (non-epistatic = first order, pairwise epistasis only =  
5 second order, higher-level epistasis = third through fifth orders). For second-fifth order models the  
6 R<sup>2</sup> specified is the increased R<sup>2</sup> that results from fitting the more complex model as compared to  
7 the next highest-order model.<sup>46</sup>  
8  
9  
10  
11  
12
